# Supplementary material for: 3D printing of conducting polymers
Source: PubMed Central journal article supplement (PMC7105462; doi:10.1038/s41467-020-15316-7), 2020-03-30
Supplement: 41467_2020_15316_MOESM1_ESM.pdf [file 41467_2020_15316_MOESM1_ESM.pdf]

# **3D Printing of Conducting Polymers**

Yuk et al.

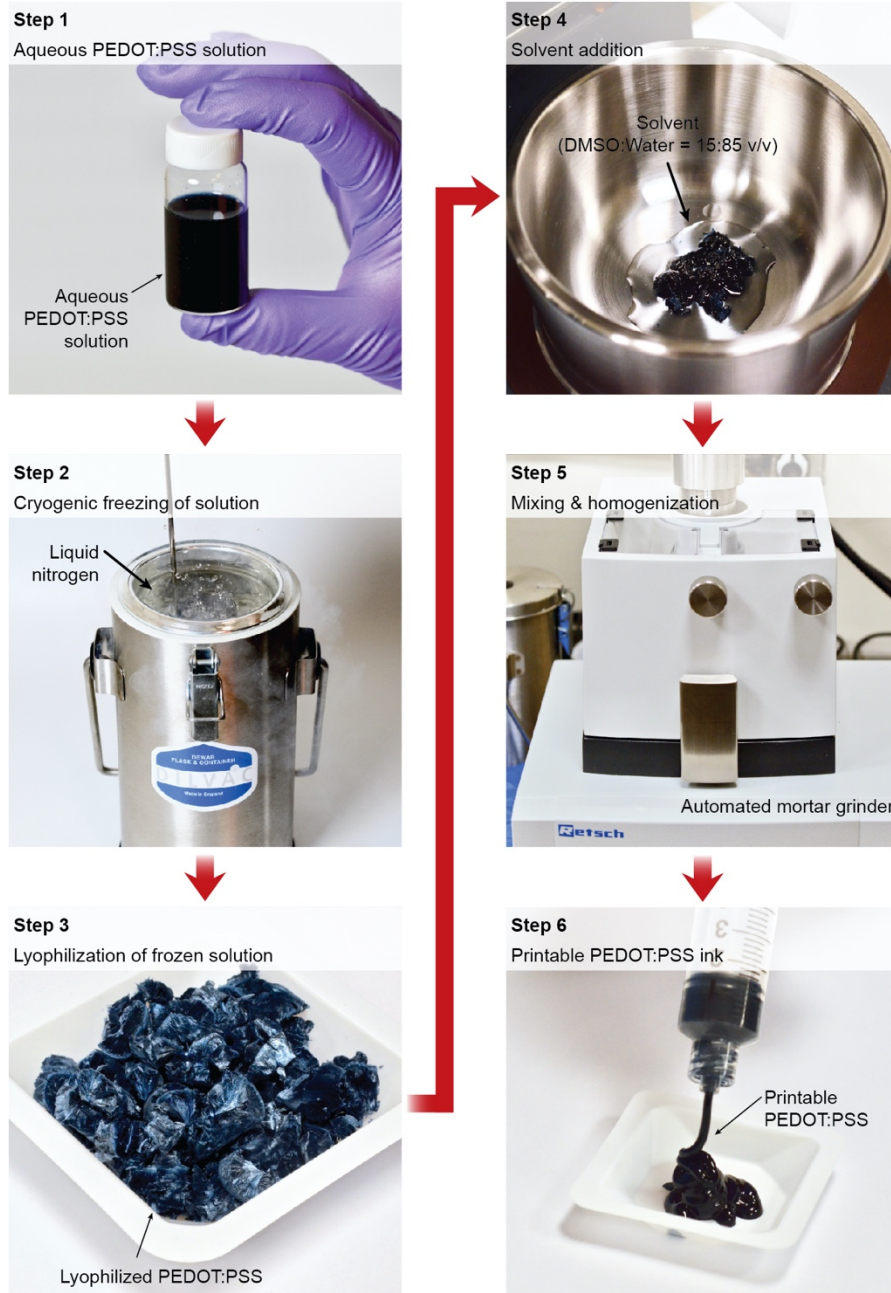

**Supplementary Figure 1 | Preparation of 3D printable conducting polymer ink.** Step 1, Stirring and filtration of a pristine PEDOT:PSS aqueous solution; Step 2, Cryogenic freezing of the PEDOT:PSS solution in a liquid nitrogen bath; Step 3, Lyophilization of the cryogenically frozen PEDOT:PSS solution to isolate PEDOT:PSS nanofibrils; Step 4, Re-dispersion of the PEDOT:PSS nanofibrils with a solvent mixture (water:DMSO = 85:15 v/v); Step 5, Mixing and homogenization by using a mortar grinder; Step 6, The resultant homogeneous 3D printable conducting polymer ink.

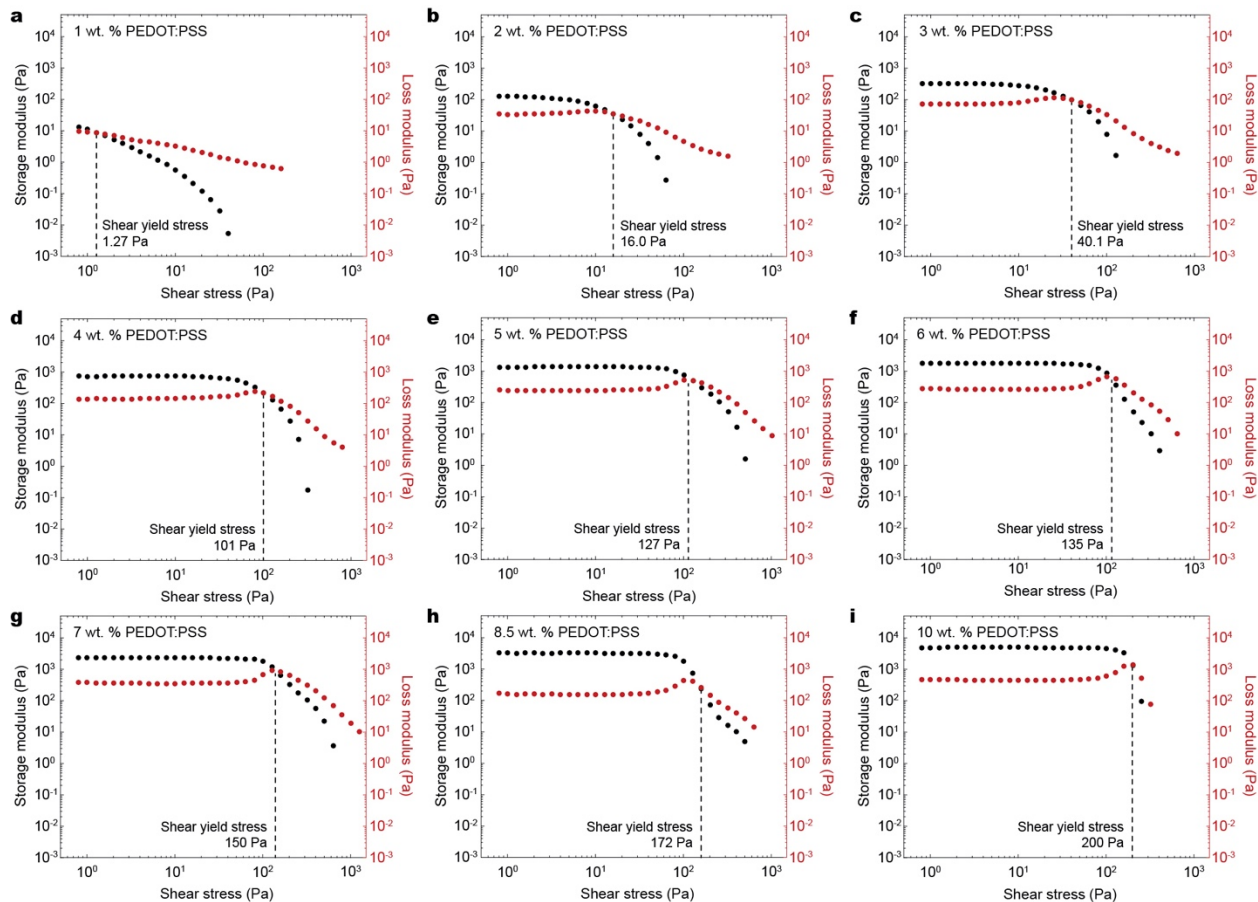

**Supplementary Figure 2 | Rheological characterizations of conducting polymer inks with varying PEDOT:PSS nanofibril concentration.** a-i, Storage and loss moduli as a function of shear stress for conducting polymer inks with PEDOT:PSS nanofibril concentration of 1 wt. % (a), 2 wt. % (b), 3 wt. % (c), 4 wt. % (d), 5 wt. % (e), 6 wt. % (f), 7 wt. % (g), 8.5 wt. % (h), and 10 wt. % (i). Shear yield stress for each ink was identified as a shear stress at which shear and loss moduli were the same values.

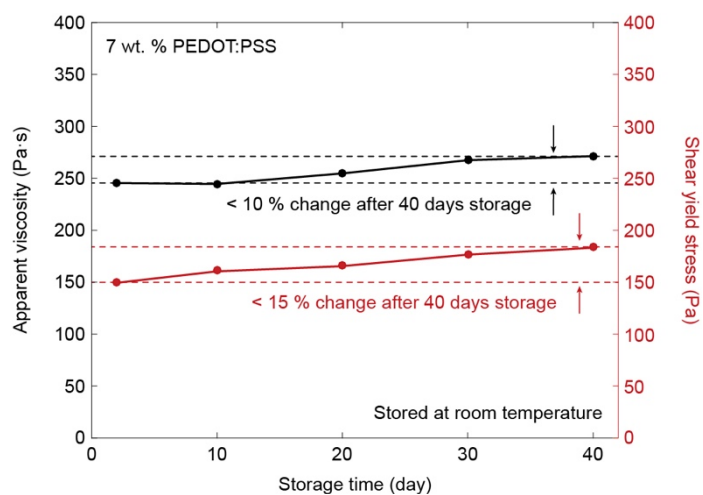

**Supplementary Figure 3 | Rheological stability of conducting polymer ink.** Apparent viscosity (black) and shear yield stress (red) of the conducting polymer ink with 7 wt. % PEDOT:PSS nanofibril concentration showed good stability over 40 days of storage at room temperature.

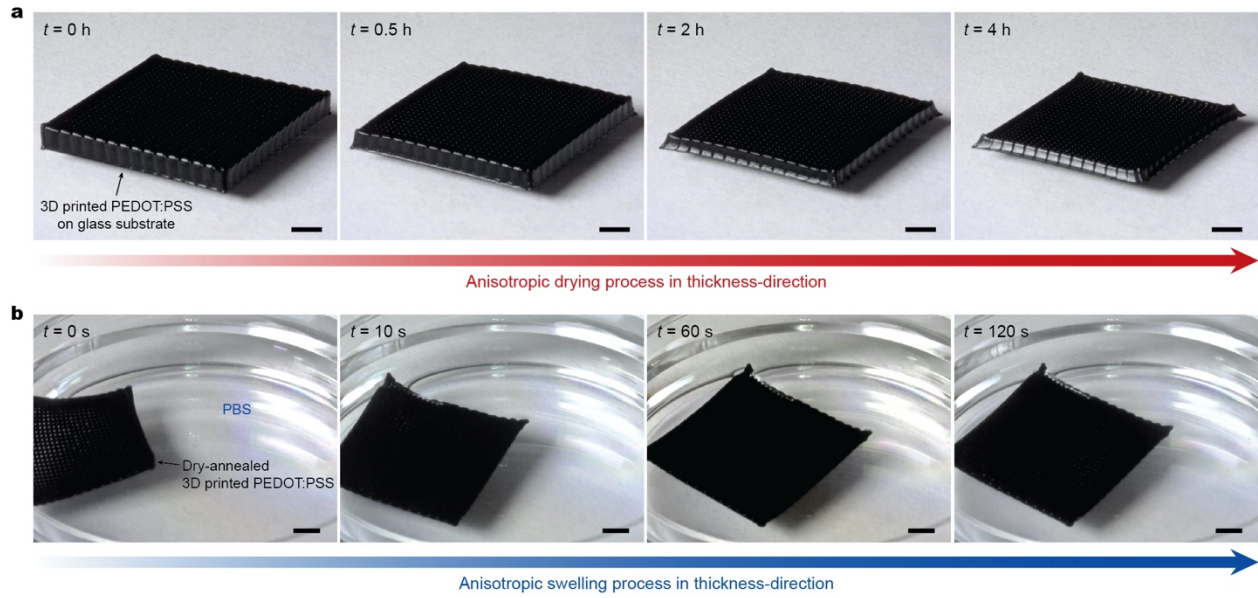

**Supplementary Figure 4 | Constrained drying and swelling processes of 3D-printed conducting polymer structure. a,** Constrained drying in thickness direction of a 20-layered 3D-printed conducting polymer mesh on a glass substrate in ambient condition. **b,** Swelling in thickness direction of the dried 3D-printed conducting polymer mesh in PBS. Scale bars, 2 mm

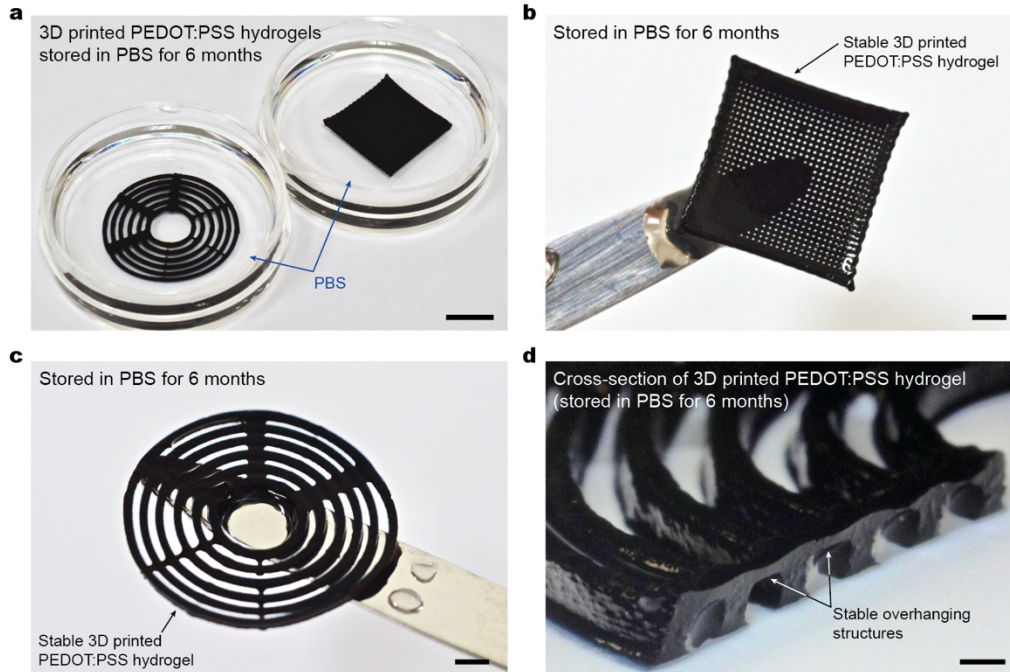

**Supplementary Figure 5 | Long-term stability of 3D-printed conducting polymer hydrogels.** **a**, Stable 3D-printed conducting polymer hydrogels stored in PBS for 6 months. **b,c**, Close up view of the 3D-printed mesh (**b**) and the overhanging (**c**) hydrogel structures stored in PBS for 6 months. **d**, Cross-section of the 3D-printed conducting polymer hydrogel stored in PBS for 6 months with stable overhanging structures. Scale bars, 5 mm (**a**); 2 mm (**b, c**); 500  $\mu$ m (**d**)

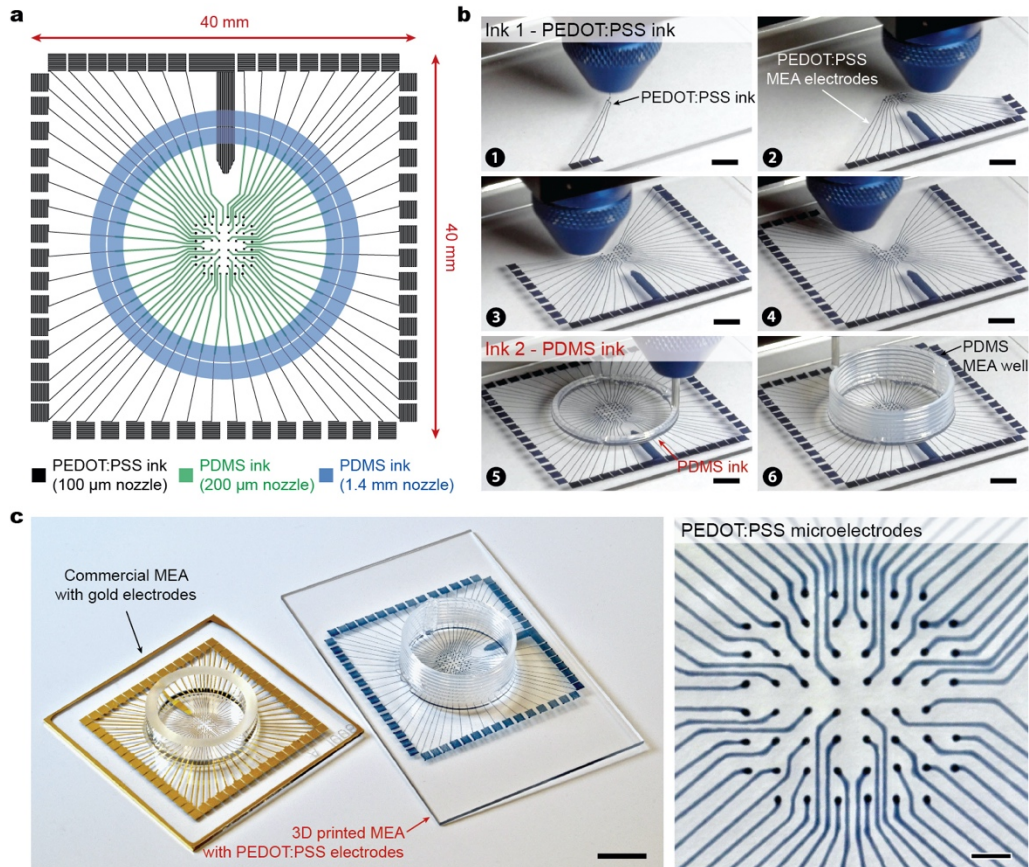

**Supplementary Figure 6 | Multi-material 3D printing of MEA.** **a**, Design and printing paths for a MEA with 60 electrodes and a culture well. **b**, Sequential snapshots for 3D printing of the MEA based on the conducting polymer ink and the PDMS ink. **c**, Image of the 3D-printed MEA placed next to a commercially-available MEA with the same design fabricated by multi-step lithographic processes and post assembly (left). Magnified view of the 3D-printed conducting polymer microelectrodes (right). Scale bars, 5 mm (**b**); 10 mm (**c**, left panel); 1 mm (**c**, right panel)

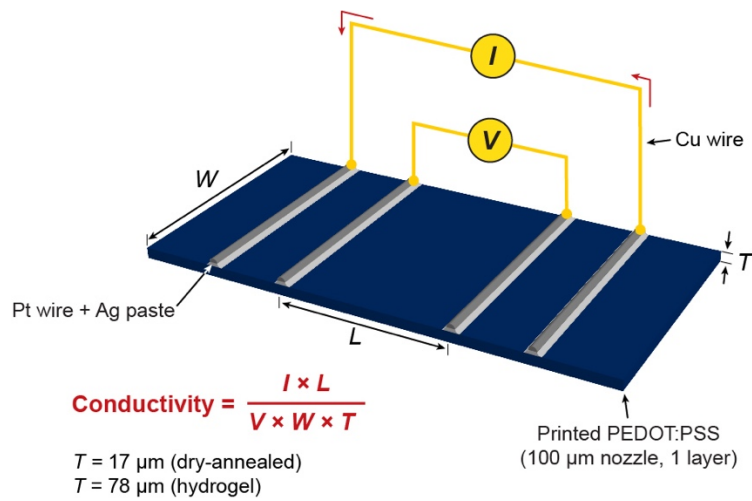

**Supplementary Figure 7 | Measurement setup for electrical conductivity of 3D-printed conducting polymers.** Four-point probe setup for electrical conductivity measurement of 3D-printed conducting polymer in dry-annealed or hydrogel states.



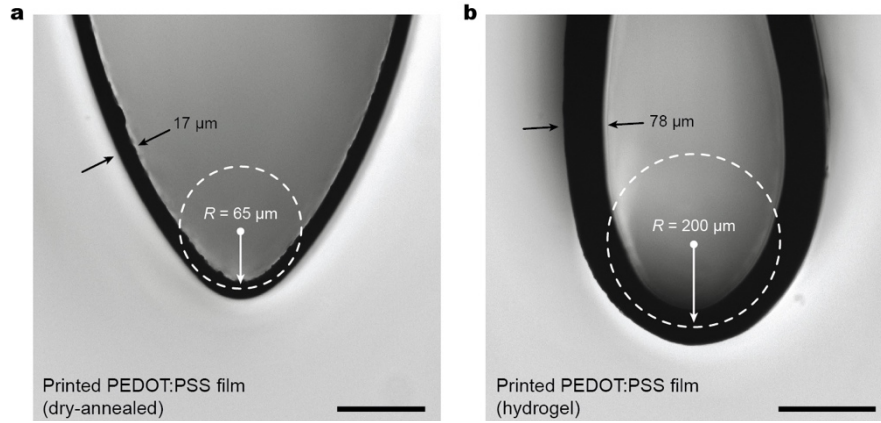

**Supplementary Figure 8 | Flexibility of 3D-printed conducting polymers. a**, Bending of a 3D-printed conducting polymer (thickness, 17  $\mu\text{m}$ ) in dry state with radius of curvature of 65  $\mu\text{m}$ . **b**, Bending of a 3D-printed conducting polymer (thickness, 78  $\mu\text{m}$ ) in hydrogel state with radius of curvature of 200  $\mu\text{m}$ . Experiments were repeated ( $n = 5$ ) based on independently prepared samples with reproducible results. Scale bars, 100  $\mu\text{m}$  (**a**); 200  $\mu\text{m}$  (**b**)

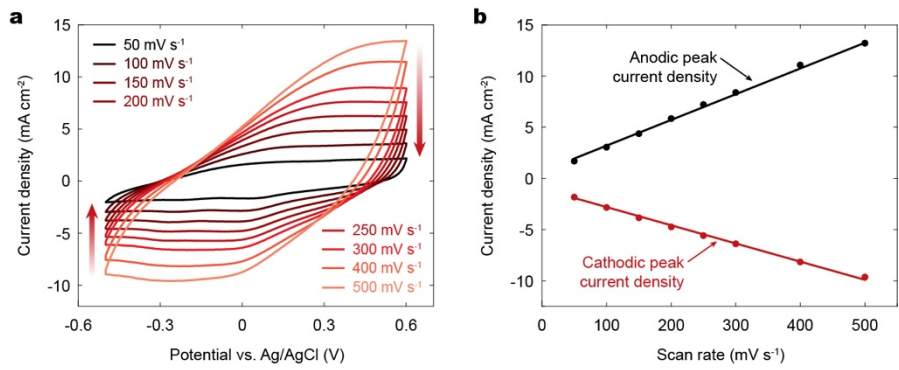

**Supplementary Figure 9 | CV characterization of 3D-printed conducting polymers at varying scan rate. a,** CV characterizations of the 3D-printed conducting polymer on Pt substrate at varying potential scan rates from 50 to 500 mV s<sup>-1</sup>. **b,** Anodic and cathodic peak current densities as a function of potential scan rates during the CV characterizations.

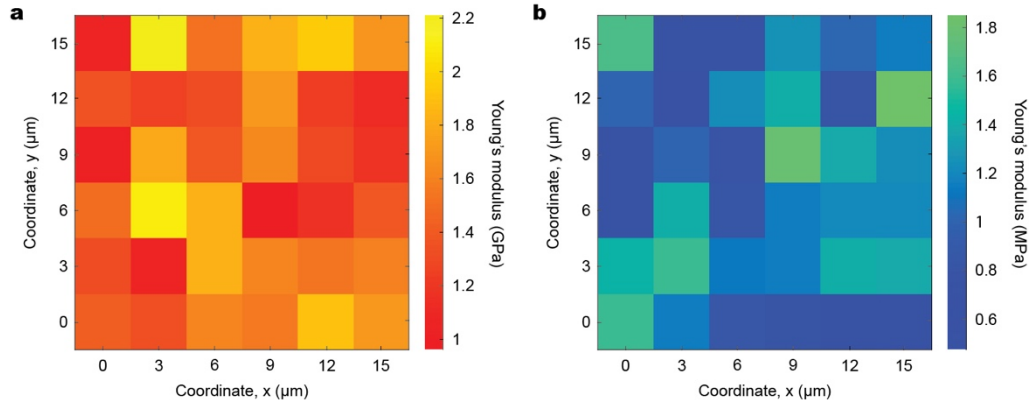

**Supplementary Figure 10 | Young's moduli map for 3D-printed conducting polymers. a,b,** Young's moduli map of a 3D-printed conducting polymer in dry (a) and hydrogel (b) states measured by nanoindentation.

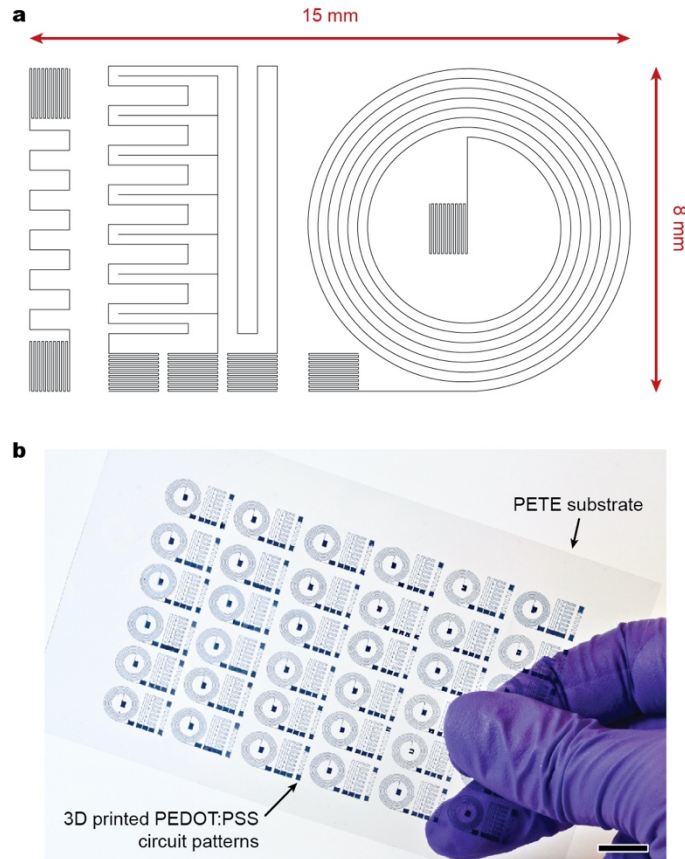

**Supplementary Figure 11 | High resolution, high throughput 3D printing of flexible circuit patterns. a,** Design and printing paths for circuits. **b,** Image of 3D-printed conducting polymer circuit patterns (108 patterns) on a flexible PETE substrate. Scale bar, 10 mm

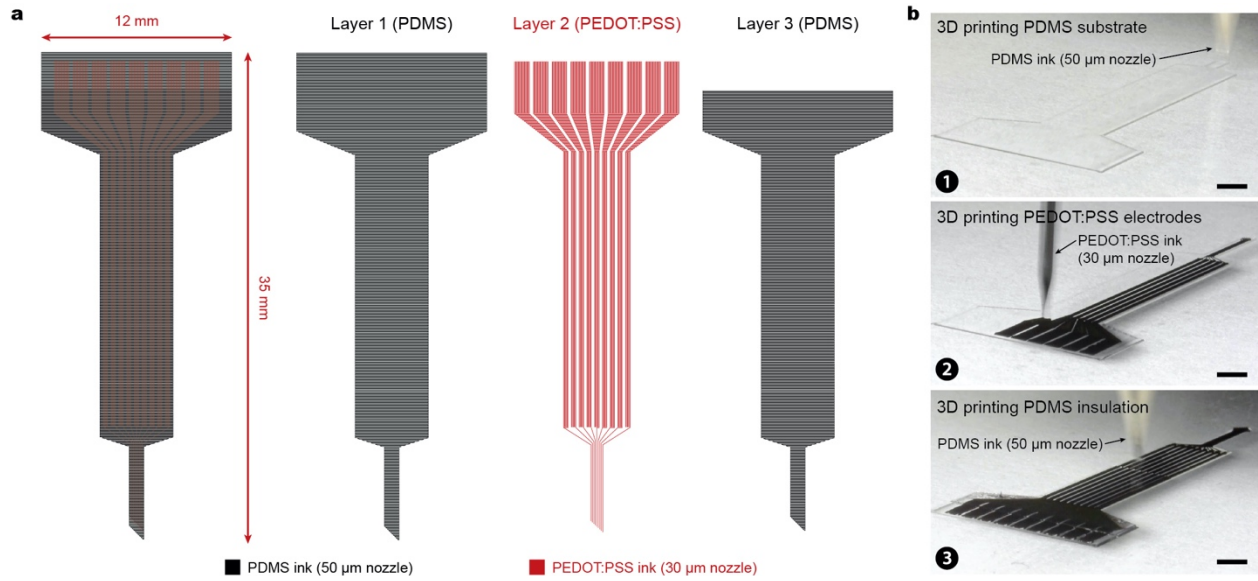

**Supplementary Figure 12 | Multi-material 3D printing of soft neural probe. a**, Design and printing paths for a soft neural probe with 9 electrode channels and insulating layers. **b**, Sequential snapshots for 3D printing of the soft neural probe based on the conducting polymer ink and the PDMS ink. Scale bars, 2 mm

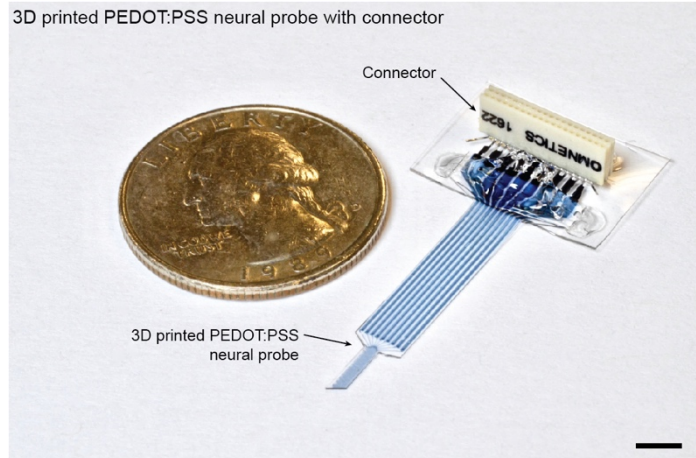

**Supplementary Figure 13 | Connector-assembled 3D-printed soft neural probe.** A multi-channel connector assembled with the 3D-printed soft neural probe for communication with electrophysiology measurement systems. Scale bar, 2 mm

**Supplementary Table 1 | Comparison of various fabrication methods for conducting polymers**

| <b>Printing method</b>     | <b>Resolution</b>                       | <b>Structure dimension</b> | <b>Multi-material compatibility</b>       | <b>Fabrication complexity</b>                 | <b>References</b> |
|----------------------------|-----------------------------------------|----------------------------|-------------------------------------------|-----------------------------------------------|-------------------|
| Aerosol printing           | > 10 $\mu\text{m}$                      | 2D                         | Yes<br>(low viscosity solutions)          | Moderate<br>(carrier-sheath gas flow systems) | 1-3               |
| Ink-jet printing           | > 50 $\mu\text{m}$                      | 2D                         | Yes<br>(low viscosity solutions)          | Low                                           | 4-9               |
| Screen printing            | > 200 $\mu\text{m}$                     | 2D                         | Yes<br>(high viscosity solutions)         | Low                                           | 10-12             |
| Lithography                | > 10 $\mu\text{m}$                      | 2D                         | Yes<br>(lithography-compatible materials) | High<br>(masking & etching processes)         | 13-16             |
| Electrochemical patterning | > 100 $\mu\text{m}$                     | 2D                         | No                                        | Low                                           | 17-19             |
| <b>This work</b>           | <b>&gt; 30 <math>\mu\text{m}</math></b> | <b>2D or 3D</b>            | <b>Yes<br/>(3D printable inks)</b>        | <b>Low</b>                                    |                   |

**Supplementary Table 2 | Comparison of electrical conductivity for various PEDOT:PSS materials**

| <b>Material</b>                              | <b>State</b>              | <b>Conductivity</b>                                                    | <b>Preparation method</b>                                           | <b>Reference</b> |
|----------------------------------------------|---------------------------|------------------------------------------------------------------------|---------------------------------------------------------------------|------------------|
| PEDOT:PSS + DMSO <sup>a</sup>                | Dry                       | 1,500 S cm <sup>-1</sup>                                               | Spin-coating & post-treatment with DMSO                             | 20               |
| PEDOT:PSS + EG <sup>b</sup>                  | Dry                       | 1,330 S cm <sup>-1</sup>                                               | Spin-coating & post-treatment with EG                               | 21               |
| PEDOT:PSS + MSA <sup>c</sup>                 | Dry                       | 3,300 S cm <sup>-1</sup>                                               | Spin-coating & post-treatment with MSA                              | 22               |
| PEDOT:PSS + ionic liquid                     | Dry                       | 3,100 S cm <sup>-1</sup>                                               | Spin-coating & post-treatment with ionic liquid                     | 7                |
| PEDOT:PSS + H <sub>2</sub> SO <sub>4</sub>   | Hydrogel                  | 8.8 S cm <sup>-1</sup>                                                 | Molding & post-treatment with H <sub>2</sub> SO <sub>4</sub>        | 23               |
| PEDOT:PSS + ionic liquid + PAAc <sup>d</sup> | Hydrogel                  | 0.23 S cm <sup>-1</sup>                                                | Molding & removal of ionic liquid in water                          | 24               |
| PEDOT:PSS + ionic liquid                     | Hydrogel                  | 47 S cm <sup>-1</sup>                                                  | Spin-coating or lithography & removal of ionic liquid in water      | 16               |
| PEDOT:PSS + Cu                               | Hydrogel                  | 0.23 S cm <sup>-1</sup>                                                | Electrogelation & removal of Cu in water                            | 19               |
| PEDOT:PSS + DMSO                             | Hydrogel                  | 40 S cm <sup>-1</sup>                                                  | Casting & removal of water and DMSO by dry-annealing                | 25               |
| <b>This work</b>                             | <b>Dry &amp; Hydrogel</b> | <b>155 S cm<sup>-1</sup> (dry)<br/>28 S cm<sup>-1</sup> (hydrogel)</b> | <b>3D printing &amp; removal of water and DMSO by dry-annealing</b> |                  |

<sup>a</sup>DMSO: Dimethyl sulfoxide

<sup>b</sup>EG: Ethylene glycol

<sup>c</sup>MSA: Methanesulfonic acid

<sup>d</sup>PAAc: Poly(acrylic acid)



## Supplementary References

- 1 Hong, K., Kim, S. H., Mahajan, A. & Frisbie, C. D. Aerosol jet printed p-and n-type electrolyte-gated transistors with a variety of electrode materials: Exploring practical routes to printed electronics. *ACS Applied Materials & Interfaces* **6**, 18704-18711 (2014).
- 2 Hong, K. *et al.* Aerosol Jet Printed, Sub-2 V Complementary Circuits Constructed from P- and N-Type Electrolyte Gated Transistors. *Advanced Materials* **26**, 7032-7037 (2014).
- 3 Thompson, B. & Yoon, H.-S. Aerosol-printed strain sensor using PEDOT: PSS. *IEEE Sensors Journal* **13**, 4256-4263 (2013).
- 4 Siringhaus, H. *et al.* High-resolution inkjet printing of all-polymer transistor circuits. *Science* **290**, 2123-2126 (2000).
- 5 Wang, J., Zheng, Z., Li, H., Huck, W. & Siringhaus, H. Dewetting of conducting polymer inkjet droplets on patterned surfaces. *Nature Materials* **3**, 171 (2004).
- 6 Pan, L. *et al.* Hierarchical nanostructured conducting polymer hydrogel with high electrochemical activity. *Proceedings of the National Academy of Sciences* **109**, 9287-9292 (2012).
- 7 Wang, Y. *et al.* A highly stretchable, transparent, and conductive polymer. *Science Advances* **3**, e1602076 (2017).
- 8 Bihar, E. *et al.* Inkjet-printed PEDOT: PSS electrodes on paper for electrocardiography. *Advanced Healthcare Materials* **6**, 1601167 (2017).
- 9 Molina-Lopez, F. *et al.* Inkjet-printed stretchable and low voltage synaptic transistor array. *Nature Communications* **10**, 1-10 (2019).
- 10 Garnier, F., Hajlaoui, R., Yassar, A. & Srivastava, P. All-polymer field-effect transistor realized by printing techniques. *Science* **265**, 1684-1686 (1994).
- 11 Shaheen, S. E., Radspinner, R., Peyghambarian, N. & Jabbour, G. E. Fabrication of bulk heterojunction plastic solar cells by screen printing. *Applied Physics Letters* **79**, 2996-2998 (2001).
- 12 Ersman, P. A. *et al.* All-printed large-scale integrated circuits based on organic electrochemical transistors. *Nature Communications* **10**, 1-9 (2019).
- 13 Sessolo, M. *et al.* Easy-to-fabricate conducting polymer microelectrode arrays. *Advanced Materials* **25**, 2135-2139 (2013).
- 14 Wang, S. *et al.* Skin electronics from scalable fabrication of an intrinsically stretchable transistor array. *Nature* **555**, 83 (2018).
- 15 Liu, Y. *et al.* Soft conductive micropillar electrode arrays for biologically relevant electrophysiological recording. *Proceedings of the National Academy of Sciences* **115**, 11718-11723 (2018).
- 16 Liu, Y. *et al.* Soft and elastic hydrogel-based microelectronics for localized low-voltage neuromodulation. *Nature Biomedical Engineering* **3**, 58 (2019).
- 17 Sekine, S., Ido, Y., Miyake, T., Nagamine, K. & Nishizawa, M. Conducting polymer electrodes printed on hydrogel. *Journal of the American Chemical Society* **132**, 13174-13175 (2010).

- 18 Ido, Y. *et al.* Conducting polymer microelectrodes anchored to hydrogel films. *ACS Macro Letters* **1**, 400-403 (2012).
- 19 Feig, V. R. *et al.* An electrochemical gelation method for patterning conductive PEDOT: PSS hydrogels. *Advanced Materials* **31**, 1902869 (2019).
- 20 Singh, R., Tharion, J., Murugan, S. & Kumar, A. ITO-free solution-processed flexible electrochromic devices based on PEDOT: PSS as transparent conducting electrode. *ACS Applied Materials & Interfaces* **9**, 19427-19435 (2016).
- 21 Fan, X., Wang, J., Wang, H., Liu, X. & Wang, H. Bendable ITO-free organic solar cells with highly conductive and flexible PEDOT: PSS electrodes on plastic substrates. *ACS Applied Materials & Interfaces* **7**, 16287-16295 (2015).
- 22 Ouyang, J. Solution-processed PEDOT: PSS films with conductivities as indium tin oxide through a treatment with mild and weak organic acids. *ACS Applied Materials & Interfaces* **5**, 13082-13088 (2013).
- 23 Yao, B. *et al.* Ultrahigh-conductivity polymer hydrogels with arbitrary structures. *Advanced Materials* **29**, 1700974 (2017).
- 24 Feig, V. R., Tran, H., Lee, M. & Bao, Z. Mechanically tunable conductive interpenetrating network hydrogels that mimic the elastic moduli of biological tissue. *Nature Communications* **9**, 2740 (2018).
- 25 Lu, B. *et al.* Pure PEDOT:PSS hydrogels. *Nature Communications* **10**, 1043 (2019).
