# Supplementary material for: 3D printing of conducting polymers
Source: PubMed Central journal article supplement (PMC7105462; doi:10.1038/s41467-020-15316-7), 2020-03-30
Supplement: 41467_2020_15316_MOESM2_ESM.pdf [file 41467_2020_15316_MOESM2_ESM.pdf]

## **Description of Additional Supplementary Files**

File Name: Supplementary Movie 1

Description: 3D printing of a 20-layered high aspect ratio structure by the conducting polymer ink.

File Name: Supplementary Movie 2

Description: 3D printing of overhanging features over high aspect ratio structures by the conducting polymer ink.

File Name: Supplementary Movie 3

Description: 3D printing of a multi-electrodes array (MEA) by the conducting polymer ink and PDMS ink.

File Name: Supplementary Movie 4

Description: High resolution and high throughput 3D printing of flexible circuit patterns by the conducting polymer ink.

File Name: Supplementary Movie 5

Description: 3D printing of a soft multi-channel neural probe by the conducting polymer ink and PDMS ink.
